# Supplementary material for: Effect of Milk-Feeding Frequency and Calcium Gluconate Supplementation on Growth, Health, and Reproductive and Metabolic Features of Holstein Heifers at a Rearing Farm
Source: MDPI journal article supplement (doi:10.3390/ani14091336), 2024-04-29
Supplement: s1 [file s1]

**Table S1.** Ingredient composition of diets.

| Ingredient, % of diet DM <sup>1</sup> | Starter Feed | Post-weaning Feed | Growth Feed | Pre-puberty Feed | AI Feed |
|---------------------------------------|--------------|-------------------|-------------|------------------|---------|
| Wet brewers' grains                   |              |                   | 35.91       | 33.5             | 52.36   |
| Straw                                 |              |                   | 13.17       | 16.75            | 20.42   |
| Wet corn gluten feed                  |              |                   |             |                  | 19.9    |
| Rapeseed                              | 4.27         | 16.93             | 1.38        | 1.38             | 2.62    |
| Cocoa hulls                           |              |                   |             |                  | 2.62    |
| Additive                              | 0.26         | 0.14              | 0.05        | 0.04             | 1.05    |
| Carbonate                             | 1.19         | 1.18              |             |                  | 0.26    |
| Orange pulp                           |              |                   | 31.92       | 29.78            |         |
| Straw                                 |              | 20.31             |             |                  |         |
| Corn                                  | 35.76        | 44.01             | 9.58        | 10.61            |         |
| Gluten feed                           |              |                   | 5.19        | 5.19             |         |
| Soybean meal 47%                      | 12.92        |                   | 0.81        | 0.81             |         |
| Oat hulls                             |              |                   | 0.61        | 0.61             |         |
| Corn DDG <sup>2</sup>                 | 8.15         | 16.93             | 0.44        | 0.44             |         |
| Salt                                  | 0.3          |                   | 0.05        | 0.05             |         |
| Barley                                | 22.85        |                   |             |                  |         |
| Soy hulls                             | 8.04         |                   |             |                  |         |
| Molasses                              | 2.98         |                   |             |                  |         |
| Mineral & vitamins calves             | 0.3          |                   |             |                  |         |
| Mineral & vitamins heifers            |              | 0.51              | 0.9         | 0.84             | 0.79    |

Abbreviations: AI: artificial insemination; DM: dry matter; DDG: distillers' corn grains.
